# Supplementary material for: Farm Suicides in Wisconsin, 2017–2018: Preliminary Findings and a Call for Future Research
Source: MDPI journal article supplement (doi:10.3390/safety7030051), 2021-06-29
Supplement: s1 [file s1]

## Data request for Wisconsin Department of Health Services

To the extent that it is recorded on the record, the Department provided the Recipient with select elements from 2017 and 2018 Wisconsin occurrence death records where

- an accident on a farm resulted in a death,
- a road accident with agriculture equipment resulted in a death,
- the manner of death was suicide and the decedent's Industry and Occupation indicate agricultural work, or
- the manner of death was homicide and the decedent's Industry and Occupation indicate agricultural work or the event happened on a farm.

### Agriculture related accidental farm deaths KEYWORDS/NOTES

+++++

#### OCCUPATION/INDUSTRY Keywords

\*\*\*\*\*

FARM\*  
AGRI\*  
CATTLE  
RANCH\*  
DAIRY  
HUSBANDRY  
LIVESTOCK  
ANIMAL  
PRODUCTION?  
NIOSH CODE=?

#### INJURY PLACE Keywords

\*\*\*\*\*

FARM  
BARN  
\*FIELD  
SHED  
HATCHERY  
ORCHARD  
SILO  
EXCLUDE: 'NURSING', 'ASSISTED'

#### INJURY DESCRIPTION keywords:

\*\*\*\*\*

##### PLACE

FARM  
BARN  
FIELD  
CROP  
SILO  
SHED  
HATCHERY  
WOODS

##### EQUIPMENT

AGRI\*  
TRACTOR  
but not SEMI TRACTOR,  
TRACTOR TRAILER  
SKID STEER  
ATV  
WAGON  
EXCAVATOR  
EQUIPMENT (?)  
COMBINE (not 'combined')

HAYBINE  
TILLAGE  
BRUSH HOG  
BUCKET  
BALE\*  
HAY  
GRAIN  
CORN\*  
MANURE  
SILAGE

##### DOING

TILL  
PLOW  
FEED  
CHORE  
CHOP\* WOOD  
CUT\* WOOD  
CLEAR\* WOOD  
BURN

##### CROP

CROP  
FRUIT  
APPLE  
MAPLE  
BEAN  
PEA  
SOY  
GRAIN  
CORN  
ALFALFA  
WHEAT  
\*CHERRY  
CRANBERRY\*  
POTATO\*  
VEGETABLE\*

##### ANIMAL

HORSE  
COW  
CATTLE  
BEEF  
DAIRY (but not MILK  
TRUCK/TANKER)  
POULTRY  
CHICKEN  
TURKEY

FOWL  
SHEEP  
LAMB  
HOG  
SWINE  
LIVESTOCK  
GOAT  
BEE

### ICD-10 CODES

V80 – Animal-rider injured by fall from/being thrown by animal transport accident  
V84 – Occupant of special vehicle mainly used in ag injured in transport accident  
V86 – Occupant of ATV or Off-Road Motor Vehicle injured in traffic  
V90 – Drowning and submersion due to accident to watercraft  
W30 – Contact w/ ag machinery  
W55 – Contact with other mammals  
Y93K – Activities involving animal care

[Y92.7](#) Farm as the place of occurrence of the external cause

[Y92.71](#) Barn as the place of occurrence of the external cause

[Y92.72](#) Chicken coop as the place of occurrence of the external cause

[Y92.73](#) Farm field as the place of occurrence of the external cause

[Y92.74](#) Orchard as the place of occurrence of the external cause

[Y92.79](#) Other farm location as the place of occurrence of the external cause
